# Supplementary material for: Core–shell structured zero-valent manganese (ZVM): a novel nanoadsorbent for efficient removal of As(iii) and As(v) from drinking water
Source: Royal Society of Chemistry journal article supplement (doi:10.1039/c9ta00428a), 2019-01-01
Supplement: c9ta00428a1.pdf [file c9ta00428a1.pdf]

## **Supporting Information**

### **Core-shell structured Zero-valent Manganese (ZVM): A novel nanoadsorbent for efficient removal of As(III) and As(V) from drinking water**

Amulya Prasad Panda,<sup>a</sup> Priyanka Rout,<sup>a</sup> Kishore K. Jena,<sup>b</sup> Saeed M. Alhassan,<sup>b</sup> Sanjukta A. Kumar,<sup>c</sup> Usha Jha,<sup>a</sup> R. K. Dey,<sup>d</sup> S. K. Swain<sup>\*e</sup>

<sup>a</sup>Department of Chemistry, Birla Institute of Technology, Mesra, Ranchi, Jharkhand, 835215, India

<sup>b</sup>Department of Chemical Engineering, Khalifa University, SAN Campus, Abu Dhabi, 2533, United Arab Emirates (UAE)

<sup>c</sup>Analytical Chemistry Division, Bhabha Atomic Research Centre, Trombay, Mumbai, 400085, India

<sup>d</sup>Department of Chemistry, Central University of Jharkhand, Ranchi, Jharkhand, 835205, India

<sup>e</sup>Central Instrumentation Facility, Birla Institute of Technology, Mesra, Ranchi, Jharkhand 835215, India

**\*Corresponding Author:** S. K. Swain, E-mail: [skswain@bitmesra.ac.in](mailto:skswain@bitmesra.ac.in), Tel.: +91-9523686103.

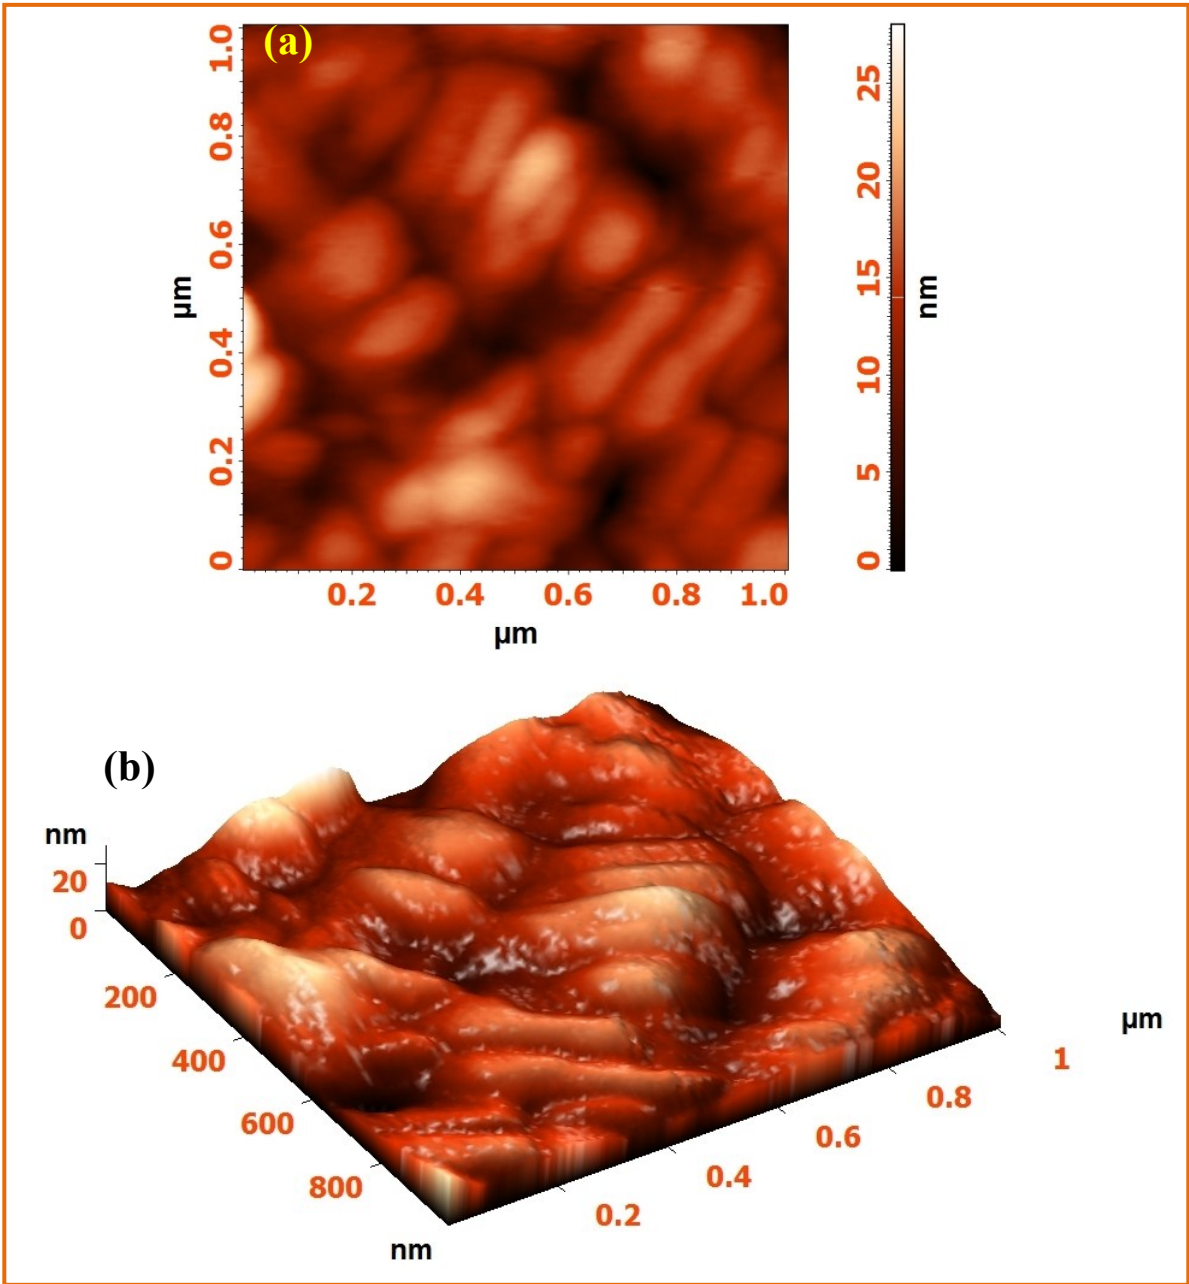

**Fig. S1.** Atomic force microscope image of ZVM surface: (a) 2-D view (b) 3-D view.

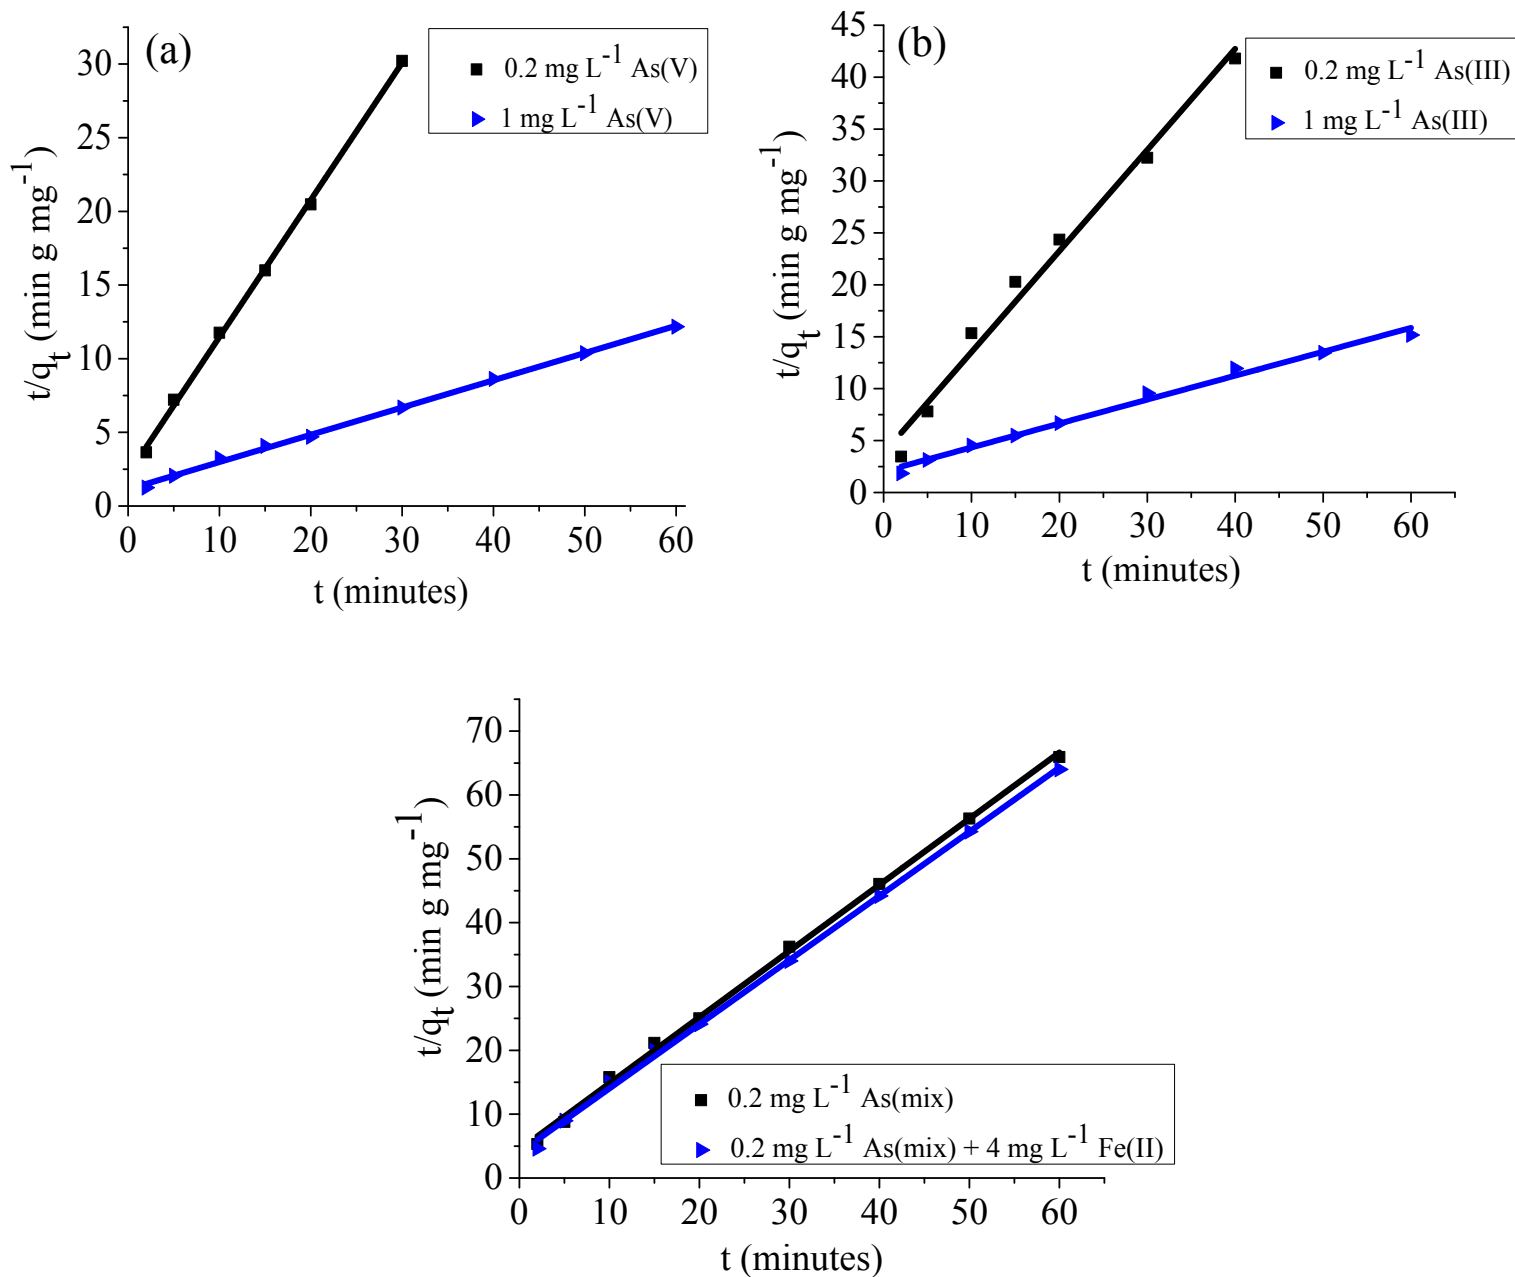

**Fig. S2.** The pseudo-second order kinetic plots for the adsorption of (a) As(V) (0.2 mg L<sup>-1</sup> and 1 mg L<sup>-1</sup>), (b) As(III) (0.2 mg L<sup>-1</sup> and 1 mg L<sup>-1</sup>), (c) As(mix) (0.2 mg L<sup>-1</sup>) and As(mix) (0.2 mg L<sup>-1</sup>) in presence of Fe(II) (4 mg L<sup>-1</sup>) by ZVM. Experimental conditions - adsorbent dose: 0.2 g L<sup>-1</sup>, volume of solution: 50 mL, pH: 6.5 ± 0.2 and temperature: 298 K.

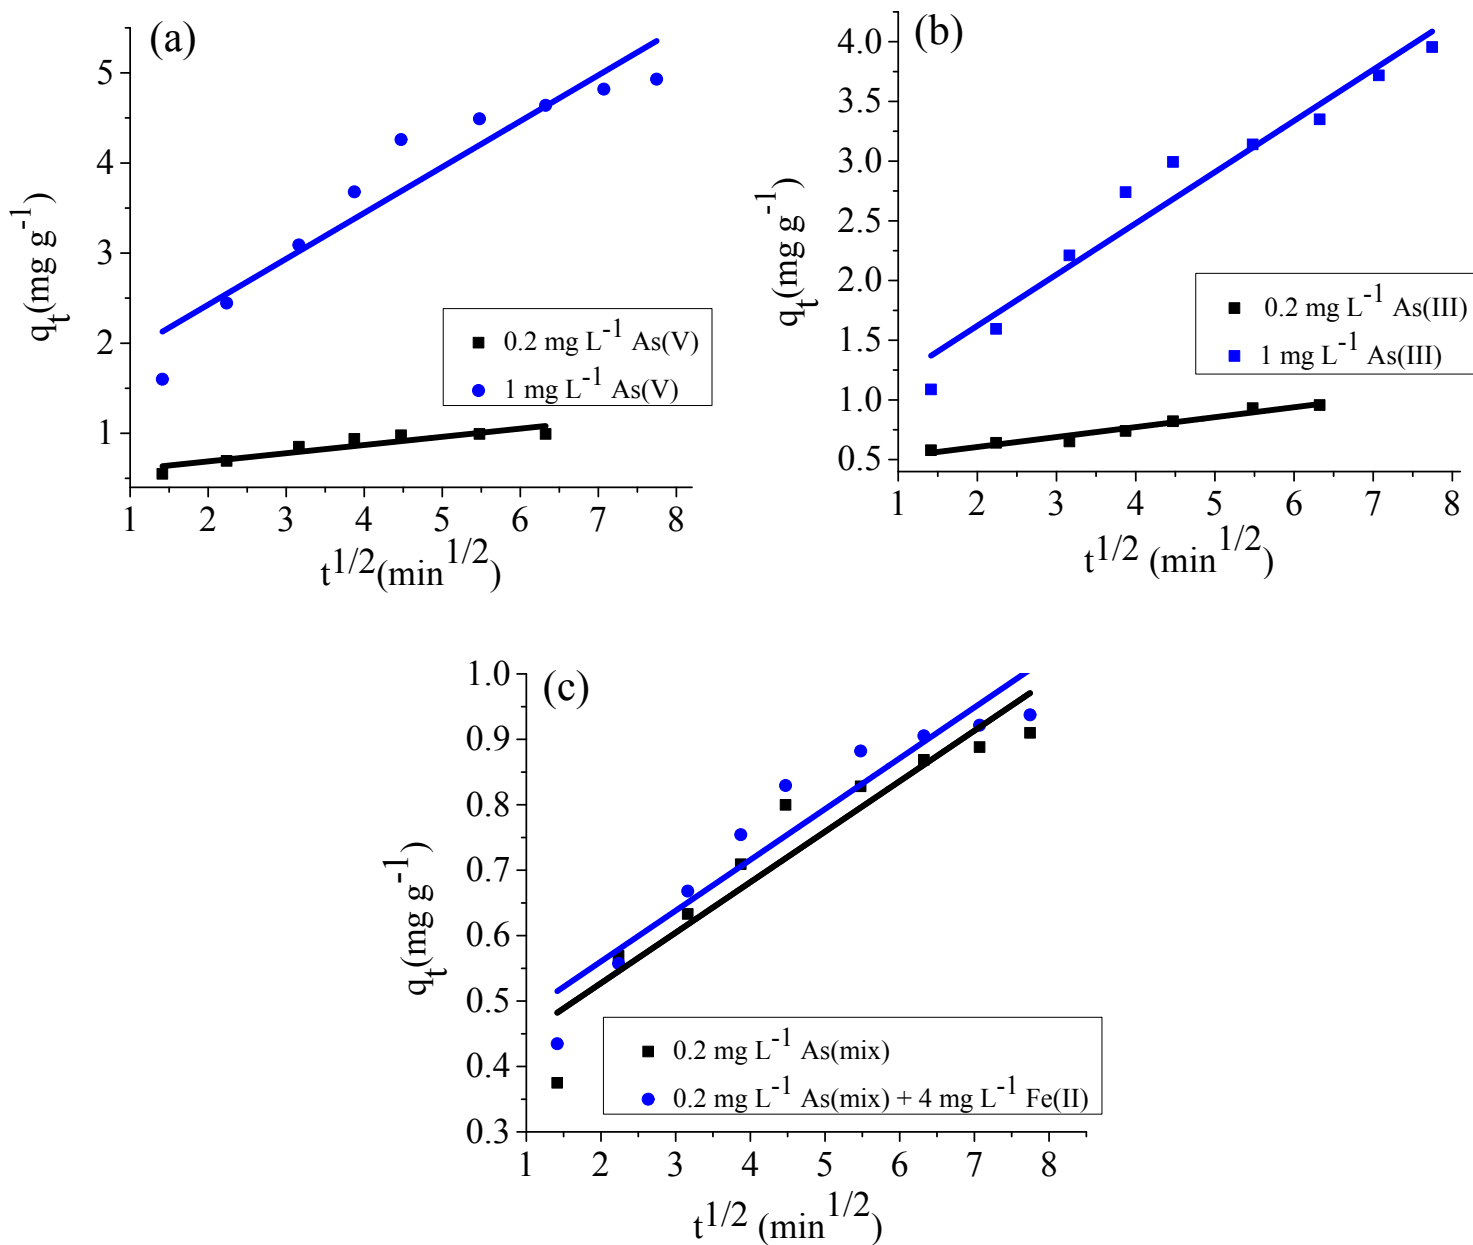

**Fig. S3.** The intra-particle diffusion kinetic plots for the adsorption of (a) As(V) (0.2 mg L<sup>-1</sup> and 1 mg L<sup>-1</sup>), (b) As(III) (0.2 mg L<sup>-1</sup> and 1 mg L<sup>-1</sup>), (c) As(mix) (0.2 mg L<sup>-1</sup>) and As(mix) (0.2 mg L<sup>-1</sup>) in presence of Fe(II) (4 mg L<sup>-1</sup>) by ZVM. Experimental conditions - adsorbent dose: 0.2 g L<sup>-1</sup>, volume of solution: 50 mL, pH: 6.5 ± 0.2 and temperature: 298 K.

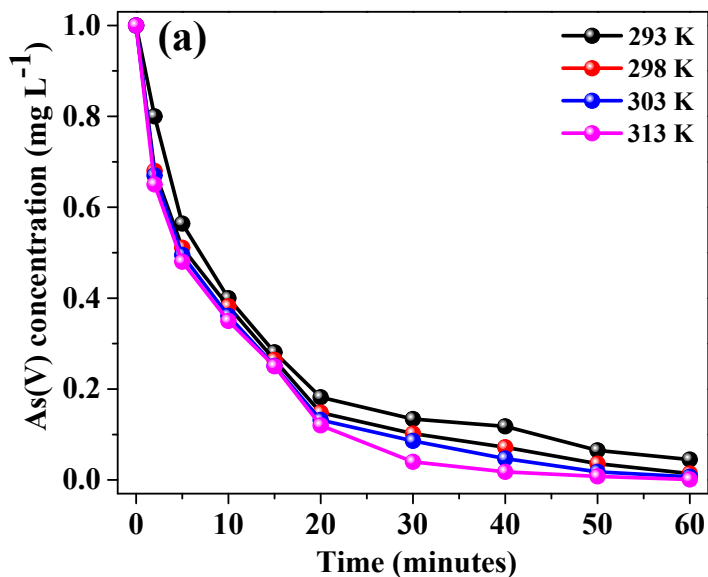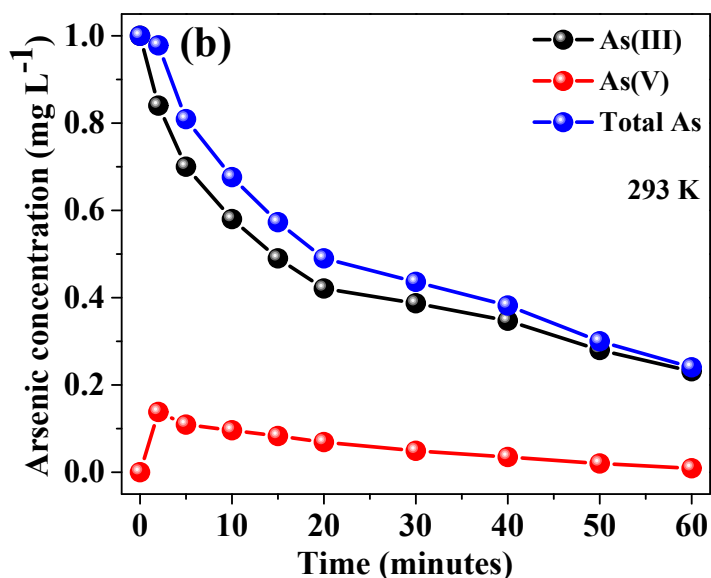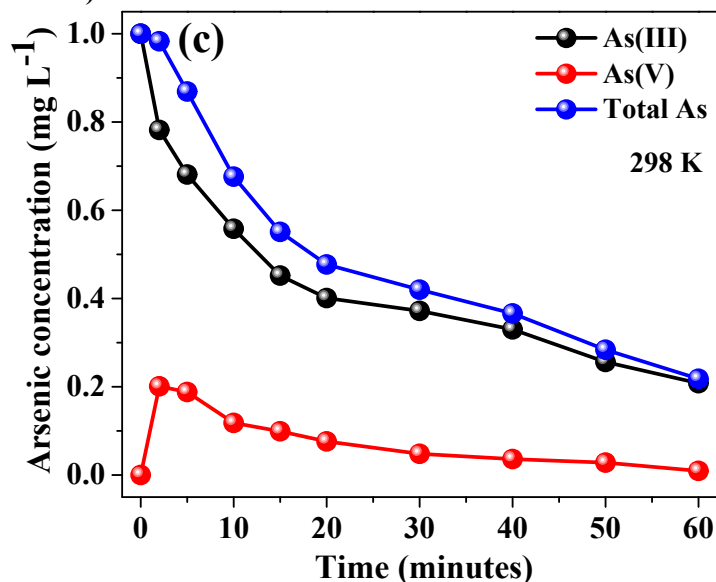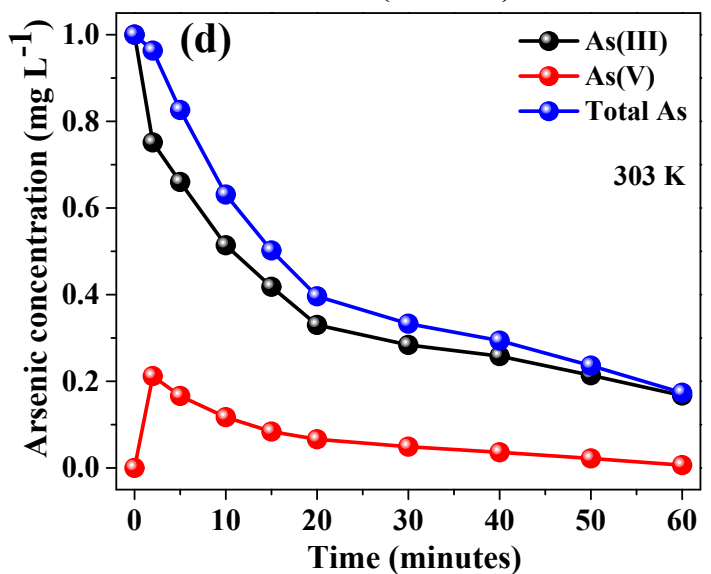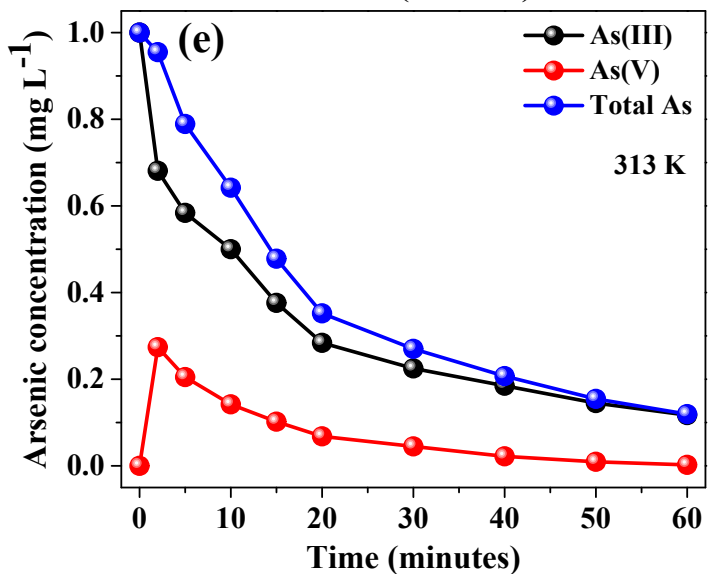

**Fig. S4.** Kinetics of (a) As(V) and (b-e) As(III) adsorption over ZVM at different temperatures. Experimental conditions: adsorbent dose: 0.2 g L<sup>-1</sup>, initial conc. of arsenic: 1 mgL<sup>-1</sup>, volume of solution: 50 mL, pH: 6.5 ± 0.2.

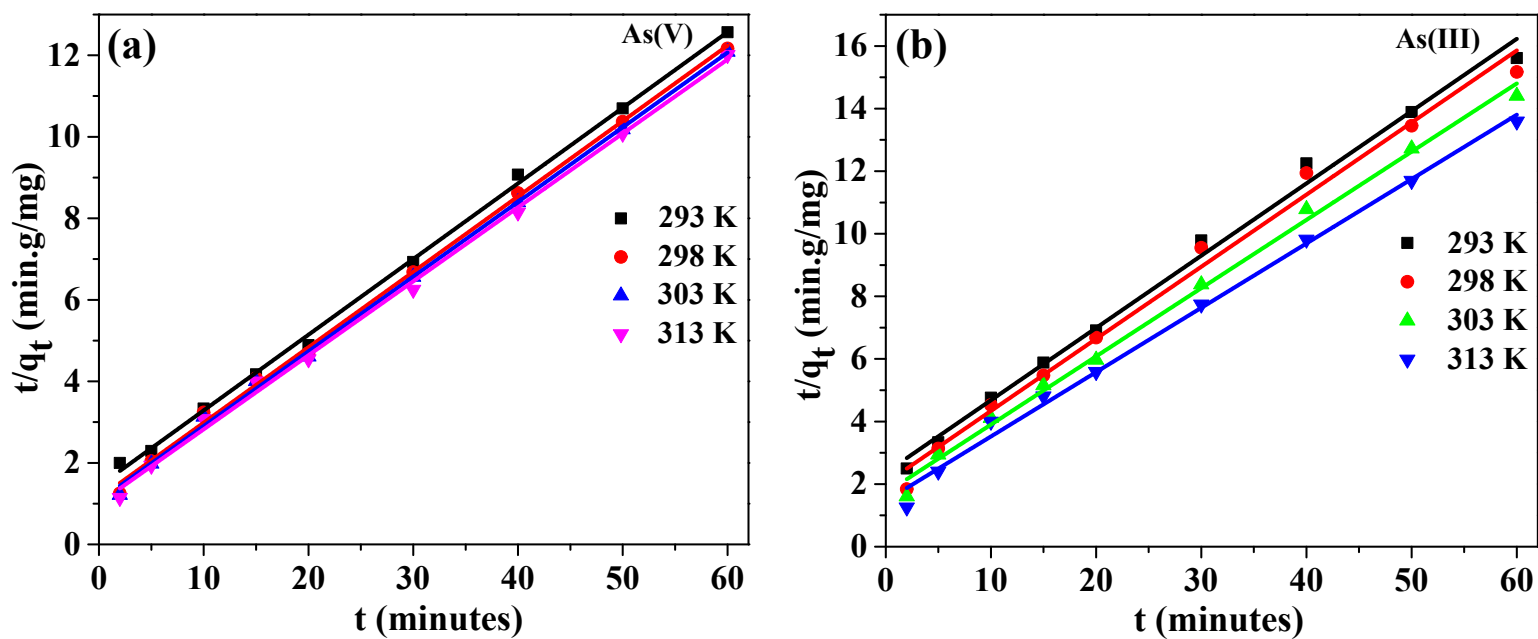

**Fig. S5.** The pseudo-second order kinetic plots for the adsorption of (a) As(V) and (b) As(III) by ZVM at different temperatures. Experimental conditions - adsorbent dose:  $0.2 \text{ g L}^{-1}$ , initial conc. of arsenic:  $1 \text{ mgL}^{-1}$ , volume of solution:  $50 \text{ mL}$ , pH:  $6.5 \pm 0.2$ .

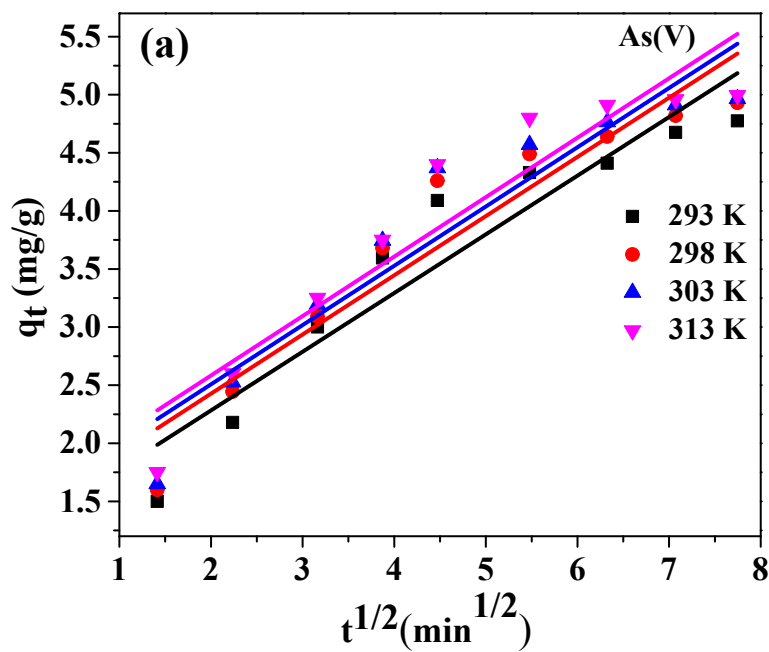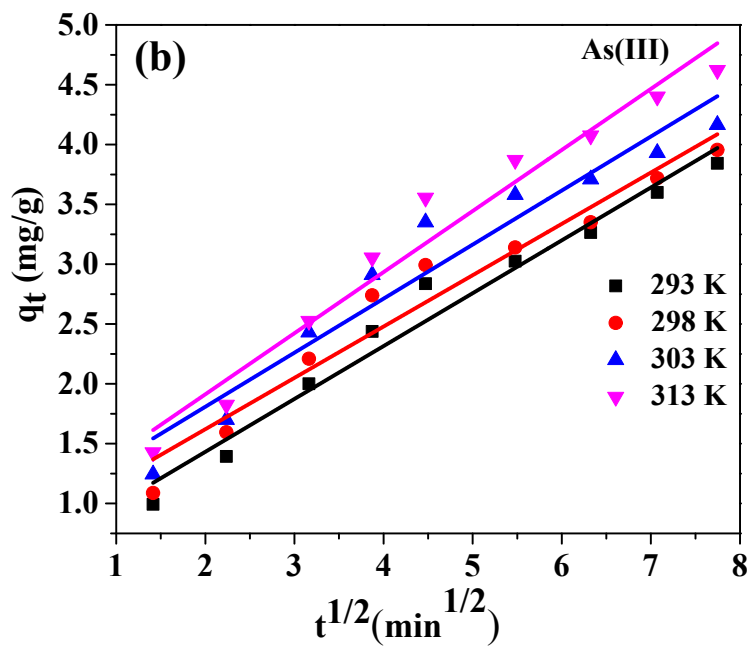

**Fig. S6.** The intra-particle diffusion kinetic plots for the adsorption of (a) As(V) and (b) As(III) by ZVM at different temperatures. Experimental conditions - adsorbent dose:  $0.2 \text{ g L}^{-1}$ , initial conc. of arsenic:  $1 \text{ mgL}^{-1}$ , volume of solution:  $50 \text{ mL}$ ,  $\text{pH}: 6.5 \pm 0.2$ .

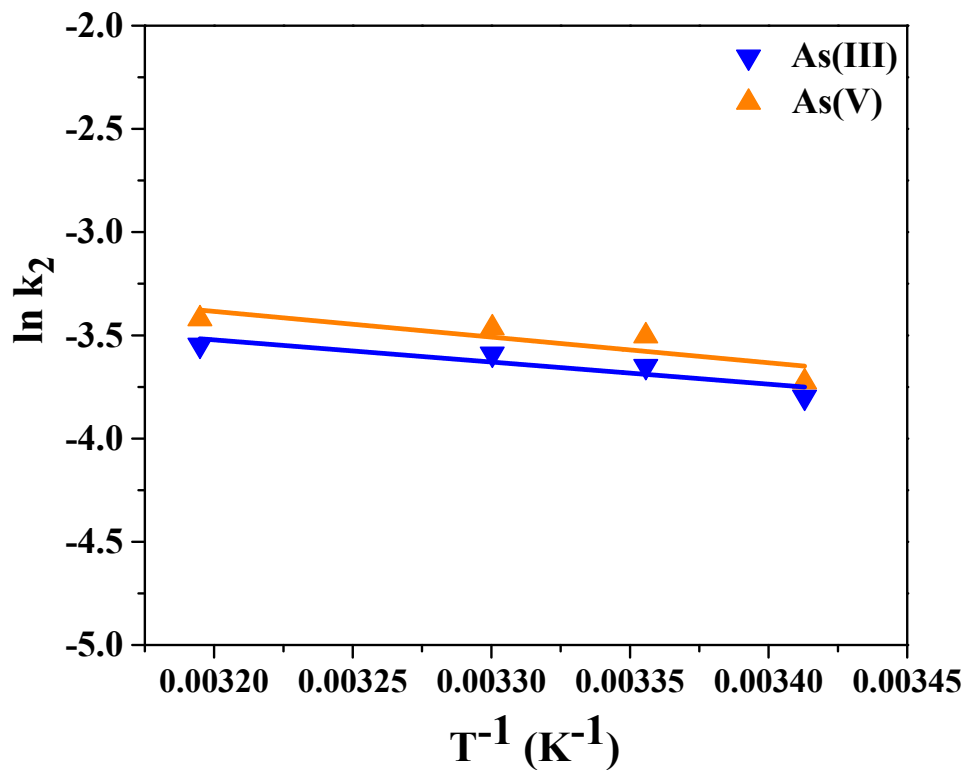

**Fig. S7.** Arrhenius plots for arsenic sorption on ZVM at different temperatures.



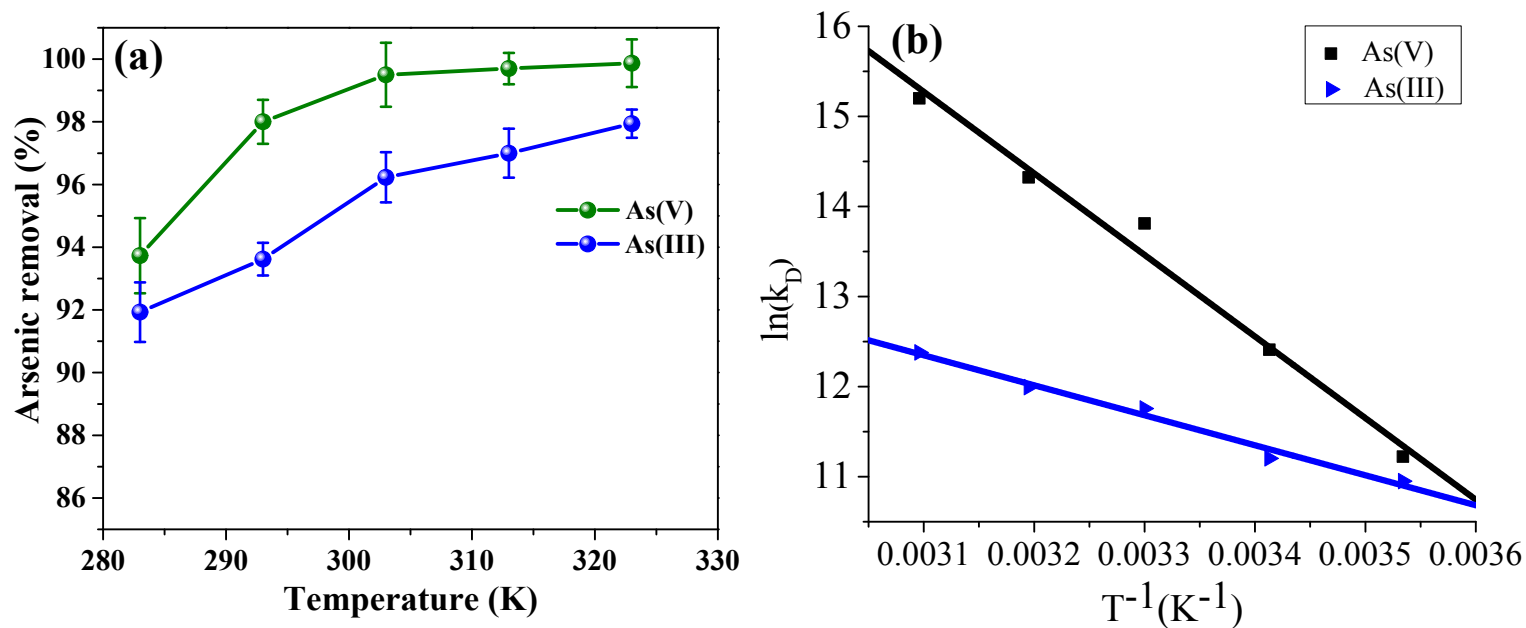

**Fig. S8.** (a) Effect of temperature on adsorption of As(III) and As(V) by ZVM and (b) The corresponding Van't Hoff plot. Experimental conditions – initial concentration of arsenic: 0.2 mg L $^{-1}$ , adsorbent dose: 0.2 g L $^{-1}$ , volume of solution: 50 mL, contact time: 60 minutes and pH: 6.5  $\pm$  0.2.

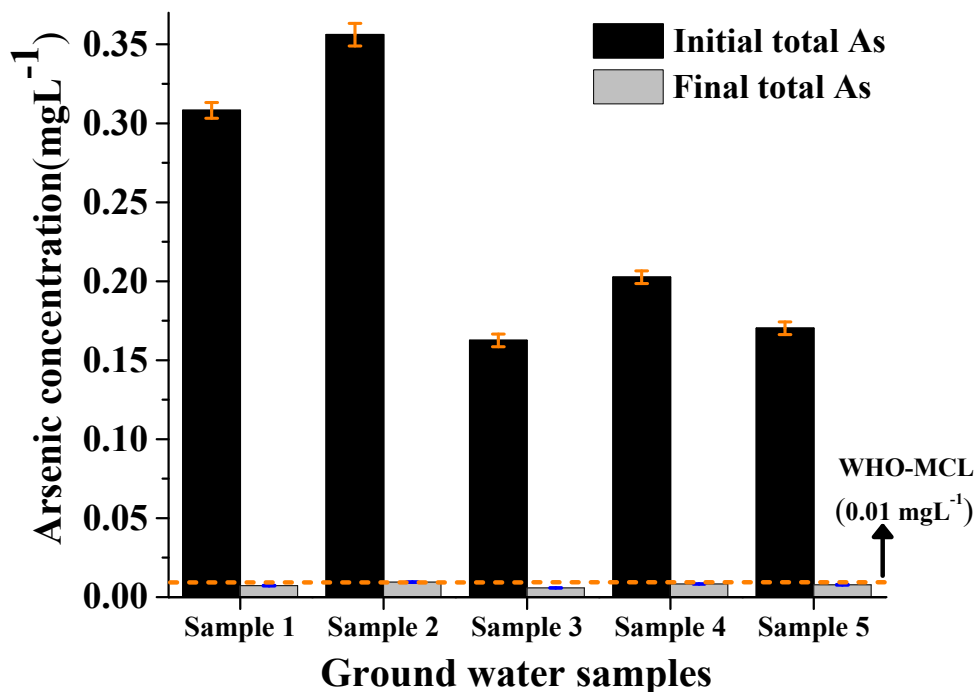

**Fig. S9.** The arsenic adsorption performance of ZVM with groundwater samples collected from Pathalkudwa Region of Ranchi District, Jharkhand, India. Experimental conditions - adsorbent dose: 0.2 g L<sup>-1</sup>, volume of solution: 50 mL, contact time: 60 minutes and temperature: 298 K.

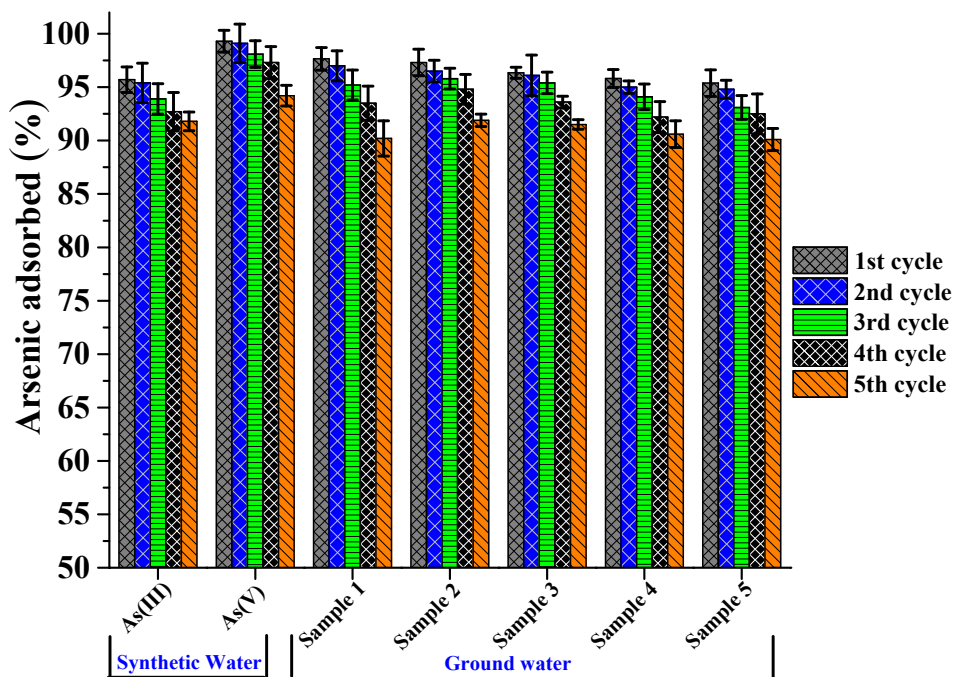

**Fig. S10.** The reusable efficiency of ZVM with synthetic water and arsenic contaminated ground water after 5 consecutive cycles. Experimental conditions – The initial concentrations of As(III) and As(V): 0.2 mg L<sup>-1</sup>, adsorbent dose: 0.2 g L<sup>-1</sup>, volume of solution: 50 mL, contact time: 60 minutes, and temperature: 298 K.

**Table S1.** The kinetic parameters associated with the adsorptions of different arsenic species of variable concentrations by ZVM.

|                             | Pseudo-first order             |                                              |                                              |                               |       | Pseudo-second order                          |                                                  |       | Intra-particle diffusion                           |                              |       |
|-----------------------------|--------------------------------|----------------------------------------------|----------------------------------------------|-------------------------------|-------|----------------------------------------------|--------------------------------------------------|-------|----------------------------------------------------|------------------------------|-------|
|                             | $C_0$<br>(mg L <sup>-1</sup> ) | $q_{e(\text{exp})}$<br>(mg g <sup>-1</sup> ) | $q_{e(\text{cal})}$<br>(mg g <sup>-1</sup> ) | $k_1$<br>(min <sup>-1</sup> ) | $R^2$ | $q_{e(\text{cal})}$<br>(mg g <sup>-1</sup> ) | $k_2$<br>(g mg <sup>-1</sup> min <sup>-1</sup> ) | $R^2$ | $k_i$<br>(mg g <sup>-1</sup> min <sup>-1/2</sup> ) | $C$<br>(mg g <sup>-1</sup> ) | $R^2$ |
| <b>As(V)</b>                | 0.2                            | 0.993                                        | 0.741                                        | 0.182                         | 0.984 | 1.074                                        | 0.400                                            | 0.998 | 0.143                                              | 0.367                        | 0.980 |
|                             | 1                              | 4.930                                        | 3.450                                        | 0.067                         | 0.984 | 5.400                                        | 0.030                                            | 0.998 | 0.509                                              | 1.407                        | 0.906 |
| <b>As(III)</b>              | 0.2                            | 0.957                                        | 0.603                                        | 0.090                         | 0.887 | 1.027                                        | 0.250                                            | 0.985 | 0.083                                              | 0.439                        | 0.960 |
|                             | 1                              | 3.955                                        | 2.848                                        | 0.045                         | 0.955 | 4.340                                        | 0.026                                            | 0.990 | 0.429                                              | 0.762                        | 0.953 |
| <b>As(mix)</b>              | 0.2                            | 0.909                                        | 0.510                                        | 0.063                         | 0.986 | 0.960                                        | 0.241                                            | 0.998 | 0.077                                              | 0.373                        | 0.896 |
| <b>As(mix)<br/>+ Fe(II)</b> | 0.2                            | 0.937                                        | 0.533                                        | 0.071                         | 0.994 | 0.994                                        | 0.253                                            | 0.998 | 0.077                                              | 0.405                        | 0.905 |

**Table S2.** The kinetic parameters associated with the adsorptions of As(III) and As(V) by ZVM at different temperatures.

|                | Pseudo-first order             |                                            |                                            |                               |       | Pseudo-second order                        |                                                  |       | Intra-particle diffusion                           |                              |       | $E_a$<br>(kJ mol <sup>-1</sup> ) |       |
|----------------|--------------------------------|--------------------------------------------|--------------------------------------------|-------------------------------|-------|--------------------------------------------|--------------------------------------------------|-------|----------------------------------------------------|------------------------------|-------|----------------------------------|-------|
|                | $C_0$<br>(mg L <sup>-1</sup> ) | $q_e(\text{exp})$<br>(mg g <sup>-1</sup> ) | $q_e(\text{cal})$<br>(mg g <sup>-1</sup> ) | $k_1$<br>(min <sup>-1</sup> ) | $R^2$ | $q_e(\text{cal})$<br>(mg g <sup>-1</sup> ) | $k_2$<br>(g mg <sup>-1</sup> min <sup>-1</sup> ) | $R^2$ | $k_i$<br>(mg g <sup>-1</sup> min <sup>-1/2</sup> ) | $C$<br>(mg g <sup>-1</sup> ) | $R^2$ |                                  |       |
| <b>As(V)</b>   | 293 K                          | 1                                          | 4.775                                      | 3.590                         | 0.068 | 0.964                                      | 5.38                                             | 0.024 | 0.998                                              | 0.505                        | 1.272 | 0.872                            | 10.34 |
|                | 298 K                          | 1                                          | 4.930                                      | 3.450                         | 0.067 | 0.984                                      | 5.40                                             | 0.030 | 0.998                                              | 0.509                        | 1.407 | 0.906                            |       |
|                | 303 K                          | 1                                          | 4.965                                      | 3.859                         | 0.080 | 0.986                                      | 5.45                                             | 0.031 | 0.998                                              | 0.510                        | 1.483 | 0.901                            |       |
|                | 313 K                          | 1                                          | 4.995                                      | 4.231                         | 0.096 | 0.994                                      | 5.50                                             | 0.032 | 0.997                                              | 0.511                        | 1.559 | 0.894                            |       |
| <b>As(III)</b> | 293 K                          | 1                                          | 3.843                                      | 2.918                         | 0.046 | 0.965                                      | 4.32                                             | 0.022 | 0.993                                              | 0.415                        | 0.554 | 0.947                            | 8.91  |
|                | 298 K                          | 1                                          | 3.955                                      | 2.848                         | 0.045 | 0.955                                      | 4.34                                             | 0.026 | 0.990                                              | 0.429                        | 0.762 | 0.953                            |       |
|                | 303 K                          | 1                                          | 4.165                                      | 2.87                          | 0.050 | 0.976                                      | 4.58                                             | 0.027 | 0.995                                              | 0.451                        | 0.905 | 0.937                            |       |
|                | 313 K                          | 1                                          | 4.415                                      | 3.218                         | 0.060 | 0.990                                      | 4.86                                             | 0.028 | 0.994                                              | 0.455                        | 1.167 | 0.953                            |       |

**Table S3.** The thermodynamic parameters associated with the adsorptions of As(V) and As(III) by ZVM.

|                | Temperature<br>(°C) | $\Delta G^\circ$<br>(kJ mol <sup>-1</sup> ) | $\Delta H^\circ$<br>(kJ mol <sup>-1</sup> ) | $\Delta S^\circ$<br>(kJ mol <sup>-1</sup> K <sup>-1</sup> ) |
|----------------|---------------------|---------------------------------------------|---------------------------------------------|-------------------------------------------------------------|
| <b>As(V)</b>   | 10                  | -26.692                                     |                                             |                                                             |
|                | 20                  | -30.297                                     |                                             |                                                             |
|                | 30                  | -33.902                                     | 75.337                                      | 0.360                                                       |
|                | 40                  | -37.508                                     |                                             |                                                             |
|                | 50                  | -41.113                                     |                                             |                                                             |
| <b>As(III)</b> | 10                  | -25.652                                     |                                             |                                                             |
|                | 20                  | -27.538                                     |                                             |                                                             |
|                | 30                  | -29.423                                     | 27.708                                      | 0.188                                                       |
|                | 40                  | -31.309                                     |                                             |                                                             |
|                | 50                  | -33.194                                     |                                             |                                                             |

**Table S4.** Chemical compositions of collected ground water samples.

|                                                          | <b>Sample 1</b> | <b>Sample 2</b> | <b>Sample 3</b> | <b>Sample 4</b> | <b>Sample 5</b> |
|----------------------------------------------------------|-----------------|-----------------|-----------------|-----------------|-----------------|
| <b>pH</b>                                                | 7.13            | 7.14            | 6.56            | 6.94            | 7.33            |
| <b>Turbidity (NTU)</b>                                   | 0.21            | 0.14            | 0.01            | 0.25            | 0.21            |
| <b>TDS (mg/L)</b>                                        | 929             | 672             | 683             | 772             | 724             |
| <b>Conductivity (<math>\mu\text{S}/\text{cm}</math>)</b> | 1896            | 1372            | 1394            | 1575            | 1477            |
| <b>Total Hardness (mg/L)</b>                             | 700             | 870             | 660             | 690             | 640             |
| <b>Total Alkalinity (mg/L)</b>                           | 150             | 155             | 140             | 145             | 170             |
| <b>K (mg/L)</b>                                          | 13.04           | 10.47           | 9.614           | 8.824           | 9.39            |
| <b>Ca (mg/L)</b>                                         | 209.64          | 270.52          | 191.08          | 196.48          | 183.2           |
| <b>Mg (mg/L)</b>                                         | 46.04           | 45.88           | 43.52           | 47.28           | 43.64           |
| <b>Na (mg/L)</b>                                         | 167.44          | 166.04          | 126.56          | 158.64          | 117.28          |
| <b>Fe (mg/L)</b>                                         | 0.07            | 0.02            | 0.03            | 0.08            | 0.05            |
| <b>Mn (mg/L)</b>                                         | 0.027           | 0.047           | 0.257           | 0.014           | 0.031           |
| <b>Zn (mg/L)</b>                                         | 0.03            | 0.029           | 0.05            | 0.046           | 0.12            |
| <b>SO<sub>4</sub><sup>2-</sup> (mg/L)</b>                | 205.0           | 160.0           | 200.0           | 185.0           | 120.0           |
| <b>NO<sub>3</sub><sup>-</sup> (mg/L)</b>                 | 35.0            | 7.8             | 3.2             | 31.0            | 21.0            |
| <b>Cl<sup>-</sup> (mg/L)</b>                             | 259.15          | 220.1           | 216.55          | 259.15          | 230.75          |
| <b>PO<sub>4</sub><sup>3-</sup> (mg/L)</b>                | 1.15            | 1.21            | 1.10            | 1.32            | 0.98            |
| <b>HCO<sub>3</sub><sup>-</sup> (mg/L)</b>                | 183.0           | 189.1           | 170.8           | 176.9           | 207.4           |
| <b>F<sup>-</sup> (mg/L)</b>                              | 0.23            | 0.24            | 0.27            | 0.25            | 0.25            |
| <b>As (mg/L)</b>                                         | 0.308           | 0.356           | 0.162           | 0.202           | 0.170           |

**Table S5: Comparison of overall arsenic removal efficiency of ZVM with other adsorbents.**

| Adsorbent                                                   | Experimental Conditions                                                                                                                                                                                                                                                     | Batch Adsorption Studies                                                                                                                                                                  |                                                                                                                                                                                        |                                                                                                                                  |                                                                                                                                                                                                                                                                                                   |                                                                                                                              |                                                                                                                                                                                           | Remarks                                                                                                                                                                                                                                                                                                                                                                                                  | Ref.      |
|-------------------------------------------------------------|-----------------------------------------------------------------------------------------------------------------------------------------------------------------------------------------------------------------------------------------------------------------------------|-------------------------------------------------------------------------------------------------------------------------------------------------------------------------------------------|----------------------------------------------------------------------------------------------------------------------------------------------------------------------------------------|----------------------------------------------------------------------------------------------------------------------------------|---------------------------------------------------------------------------------------------------------------------------------------------------------------------------------------------------------------------------------------------------------------------------------------------------|------------------------------------------------------------------------------------------------------------------------------|-------------------------------------------------------------------------------------------------------------------------------------------------------------------------------------------|----------------------------------------------------------------------------------------------------------------------------------------------------------------------------------------------------------------------------------------------------------------------------------------------------------------------------------------------------------------------------------------------------------|-----------|
|                                                             |                                                                                                                                                                                                                                                                             | Effect of pH                                                                                                                                                                              | Kinetic Studies                                                                                                                                                                        | Isotherm Studies                                                                                                                 | Effect of interfering anions                                                                                                                                                                                                                                                                      | Ground water study                                                                                                           | Reuse Studies                                                                                                                                                                             |                                                                                                                                                                                                                                                                                                                                                                                                          |           |
| <b>HBC-Fe<sub>3</sub>O<sub>4</sub>-MnO<sub>2</sub></b>      | <ul style="list-style-type: none"> <li>• <b>Dose:</b> 0.2 g/L</li> <li>• <b>pH:</b> 7.0 ± 0.1</li> <li>• <b>Time:</b> 16 hr</li> <li>• <b>C<sub>0</sub>:</b> 100-800 µg/L As(III/V)</li> <li>• <b>Vol. of Sample:</b> 50 ml</li> <li>• <b>Temperature:</b> 25° C</li> </ul> | <ul style="list-style-type: none"> <li>• Maximum removal observed in acidic pH. However removal efficiency decreased with increase of pH and 40% was obtained at pH 9.0.</li> </ul>       | <ul style="list-style-type: none"> <li>• 97% of removal was achieved in 12 hr for initial concentrations of 100 µg/L As(III)/As(V).</li> <li>• Pseudo-second order kinetics</li> </ul> | As(III): q <sub>m</sub> = 2.42 mg/g<br>Freundlich isotherm model<br>As(V): q <sub>m</sub> = 1.45 mg/g<br>Langmuir isotherm model | <ul style="list-style-type: none"> <li>• No significant interference of Cl<sup>-</sup>, SO<sub>4</sub><sup>2-</sup>, NO<sub>3</sub><sup>-</sup>.</li> <li>• Removal efficiency decreased to 25.49% and 13.80% of As(III) and As(V) in presence of 10mM of PO<sub>4</sub><sup>3-</sup>.</li> </ul> | NR                                                                                                                           | <ul style="list-style-type: none"> <li>• The reusability capacity of the material was reduced to 65.5% after 5<sup>th</sup> cycle of operation with regeneration of adsorbent.</li> </ul> | <ul style="list-style-type: none"> <li>• Less removal in the neutral pH.</li> <li>• Takes extended time of 12 hr to reach equilibrium concentrations</li> <li>• Not effective for successive application in treating higher concentration of arsenic contaminated water.</li> <li>• Pronounced inhibitory effect of HCO<sub>3</sub><sup>-</sup> and PO<sub>4</sub><sup>3-</sup> was witnessed</li> </ul> | <b>S1</b> |
| <b>Aluminium Oxide/Hydroxide Nanoparticles (AHNP)</b>       | <ul style="list-style-type: none"> <li>• <b>Dose:</b> 2 g/L</li> <li>• <b>pH:</b> 7</li> <li>• <b>Time:</b> 300 minutes</li> <li>• <b>C<sub>0</sub>:</b> 100-1000 µg/L</li> <li>• <b>Vol. of Sample:</b> 50 ml</li> <li>• <b>Temperature:</b> 25 °C</li> </ul>              | <ul style="list-style-type: none"> <li>• Maximum 85% of removal was observed at pH 7.0 for 500 µg/L of As(III).</li> </ul>                                                                | <ul style="list-style-type: none"> <li>• 85% of removal was achieved in 300 minutes for 500 µg/L of arsenic.</li> <li>• Pseudo-second order kinetics</li> </ul>                        | As(III): q <sub>m</sub> = 0.833 mg/g<br>Langmuir isotherm model<br>As(V): NR                                                     | NR                                                                                                                                                                                                                                                                                                | In groundwater, 8g/L of adsorbent was required to reduce the arsenic concentration (512µg/L) below WHO limit in 300 minutes. | NR                                                                                                                                                                                        | <ul style="list-style-type: none"> <li>• Takes extended time of 300 minutes to reach equilibrium that too with high amount of adsorbent (2 g/L).</li> <li>• The maximum removal efficiency of the material was only 85% for 500g/L</li> <li>• Requires higher adsorbent dose to remediate arsenic in groundwater.</li> </ul>                                                                             | <b>S2</b> |
| <b>Copper Oxide incorporated mesoporous Alumina (COIMA)</b> | <ul style="list-style-type: none"> <li>• <b>Dose:</b> 0.4 g/L</li> <li>• <b>pH:</b> NR</li> <li>• <b>Time:</b> 24 hr</li> <li>• <b>C<sub>0</sub>:</b> 1 mg/L</li> <li>• <b>Vol. of Sample:</b> 50 ml</li> <li>• <b>Temperature:</b> 30 ±1 °C</li> </ul>                     | <ul style="list-style-type: none"> <li>• Maximum removal observed in acidic pH.</li> <li>• At neutral pH the removal of As(V) is around 75% and that of As(III) is around 85%.</li> </ul> | <ul style="list-style-type: none"> <li>• Adsorption equilibrium achieved in 500 minutes.</li> </ul>                                                                                    | As(III): q <sub>m</sub> = 2.161 mg/g<br>Langmuir isotherm model<br>As(V): q <sub>m</sub> = 2.017 mg/g<br>Langmuir isotherm model | In presence of coexisting anions (PO <sub>4</sub> <sup>3-</sup> , SO <sub>4</sub> <sup>2-</sup> , NO <sub>3</sub> <sup>-</sup> , HCO <sub>3</sub> <sup>-</sup> , CO <sub>3</sub> <sup>2-</sup> ), As(V) uptake reduced considerably while As(III) removal efficiency decreased to 80% .           | NR                                                                                                                           | Adsorption capacity remains constant after fourth cycles of regeneration and reuse.                                                                                                       | <ul style="list-style-type: none"> <li>• Less effective at neutral pH.</li> <li>• Negative effect of coexisting anions in As(V) uptake.</li> <li>• Required high reaction time to reach equilibrium.</li> </ul>                                                                                                                                                                                          | <b>S3</b> |

|                                                                      |                                                                                                                                                                                                                                                                                                                          |                                                                                                                                                                                                                        |                                                                                                                                                                                                                                                                                                   |                                                                                                                        |                                                                                                                                                                                                                                                                                                                                          |    |                                                                                                                                                                                                                                       |                                                                                                                                                                                                                                                                                                                      |           |
|----------------------------------------------------------------------|--------------------------------------------------------------------------------------------------------------------------------------------------------------------------------------------------------------------------------------------------------------------------------------------------------------------------|------------------------------------------------------------------------------------------------------------------------------------------------------------------------------------------------------------------------|---------------------------------------------------------------------------------------------------------------------------------------------------------------------------------------------------------------------------------------------------------------------------------------------------|------------------------------------------------------------------------------------------------------------------------|------------------------------------------------------------------------------------------------------------------------------------------------------------------------------------------------------------------------------------------------------------------------------------------------------------------------------------------|----|---------------------------------------------------------------------------------------------------------------------------------------------------------------------------------------------------------------------------------------|----------------------------------------------------------------------------------------------------------------------------------------------------------------------------------------------------------------------------------------------------------------------------------------------------------------------|-----------|
| <b>FeOOH/ <math>\gamma</math>-<math>\text{Al}_2\text{O}_3</math></b> | <ul style="list-style-type: none"> <li>• <b>Dose:</b> 5 g/L</li> <li>• <b>pH:</b> Natural pH</li> <li>• <b>Time:</b> 60 minutes</li> <li>• <b><math>C_0</math>:</b> 10-100 mg/L</li> <li>• <b>Vol. of Sample:</b> 220 ml</li> <li>• <b>Temperature:</b> 25 °C</li> </ul>                                                 | <ul style="list-style-type: none"> <li>• Maximum removal observed in neutral pH but the final arsenic concentration does not meet the WHO standard.</li> <li>• The final pH of the solution reduces to 4.0.</li> </ul> | <ul style="list-style-type: none"> <li>• Adsorption equilibrium achieved in 60 minutes for initial concentration of 10 mg/L arsenic.</li> <li>• Pseudo-second order kinetics.</li> </ul>                                                                                                          | As(III): NR<br><br>As(V): $q_m = 3,541$ mg/g<br>Langmuir isotherm model                                                | The presence of $\text{SO}_4^{2-}$ , $\text{Cl}^-$ and $\text{NO}_3^-$ had significant negative effects on As(III) adsorption.                                                                                                                                                                                                           | NR | NR                                                                                                                                                                                                                                    | <ul style="list-style-type: none"> <li>• Requires higher adsorbent dose.</li> <li>• The pH of the final solution decreases to 4.0.</li> <li>• Final arsenic concentration does not meet the WHO standard.</li> </ul>                                                                                                 | <b>S4</b> |
| <b>Porous <math>\text{Fe}_3\text{O}_4</math> Particles</b>           | <ul style="list-style-type: none"> <li>• <b>Dose:</b> 0.5 g/L</li> <li>• <b>pH:</b> <math>5.0 \pm 0.2</math></li> <li>• <b>Time:</b> 4 hr</li> <li>• <b><math>C_0</math>:</b> 0.1-17 mg/L for As(III) and 0.1-7.5 mg/L for As(V)</li> <li>• <b>Vol. of Sample:</b> 10 ml</li> <li>• <b>Temperature:</b> 25 °C</li> </ul> | <ul style="list-style-type: none"> <li>• Adsorption studies conducted at pH 5.0.</li> </ul>                                                                                                                            | <ul style="list-style-type: none"> <li>• Maximum removal of 90.7% for As(V) and 88.3% for As(III) was achieved in 4 hr for initial concentration of 3 mg/L of As(III) and 3.5 mg/L of As(V).</li> <li>• Pseudo-second order kinetics.</li> </ul>                                                  | As(III): 6.06 mg/L<br>Freundlich Isotherm<br><br>As(V): $q_m = 6.35$ mg/L<br>Langmuir Isotherm                         | NR                                                                                                                                                                                                                                                                                                                                       | NR | The reusability capacity of the material was reduced to 85% after 5 <sup>th</sup> cycle of operation with regeneration of adsorbent.                                                                                                  | <ul style="list-style-type: none"> <li>• Batch experiments conducted at acidic pH which does not fall under the pH range of drinking water.</li> <li>• Shows only 85% of arsenic removal even after regeneration.</li> </ul>                                                                                         | <b>S5</b> |
| <b>Fe-MWCNT</b>                                                      | <ul style="list-style-type: none"> <li>• <b>Dose:</b> 1 g/L</li> <li>• <b>pH:</b> 4</li> <li>• <b>Time:</b> 1 hr for As(V) and 12 hr for As(III)</li> <li>• <b><math>C_0</math>:</b> 0.1 mg/L</li> <li>• <b>Vol. of Sample:</b> 10 ml</li> <li>• <b>Temperature:</b> 28-40°C</li> </ul>                                  | <ul style="list-style-type: none"> <li>• Maximum removal for As(V) was observed at pH 4.0 and for As(III) at pH 5.0.</li> </ul>                                                                                        | <ul style="list-style-type: none"> <li>• 99 % of As(V) and 80 % of As(III) were removed in 30 minutes for 100 <math>\mu\text{g/L}</math> of arsenic at pH 4.0.</li> <li>• Pseudo-second order kinetics.</li> </ul>                                                                                | As(III): $q_m = 1.723$ mg/g<br>Freundlich isotherm model<br><br>As(V): $q_m = 0.189$ mg/g<br>Freundlich isotherm model | NR                                                                                                                                                                                                                                                                                                                                       | NR | NR                                                                                                                                                                                                                                    | <ul style="list-style-type: none"> <li>• Batch experiments conducted at pH 4 which does not fall under the pH range of drinking water.</li> <li>• Other important adsorption parameters were not studied</li> </ul>                                                                                                  | <b>S6</b> |
| <b>Copper (II) Oxide</b>                                             | <ul style="list-style-type: none"> <li>• <b>Dose:</b> 1 g/L</li> <li>• <b>pH:</b> 7</li> <li>• <b>Time:</b> 24 hr</li> <li>• <b><math>C_0</math>:</b> 0.5-1 mg/L</li> <li>• <b>Vol. of Sample:</b> 100 ml</li> <li>• <b>Temperature:</b> <math>25 \pm 2^\circ\text{C}</math></li> </ul>                                  | <ul style="list-style-type: none"> <li>• 100% arsenic was removed from water at pH above 8.0 while removal percentage decreased to 75% in acidic pH.</li> </ul>                                                        | <ul style="list-style-type: none"> <li>• 92% removal of As(III) was achieved for initial concentration of 1000 <math>\mu\text{g/L}</math> and 100% removal achieved for 200 <math>\mu\text{g/L}</math> initial arsenic concentration in 3 hr.</li> <li>• Pseudo-second order kinetics.</li> </ul> | As(III): $q_m = 1.086$ mg/g<br>Langmuir isotherm model<br><br>As(V): NR                                                | <ul style="list-style-type: none"> <li>• The presence of <math>\text{SO}_4^{2-}</math> at very high concentrations (280 mg/L) decreased the arsenic removal percentage by less than 10%.</li> <li>• More than 20% decrease in arsenic removal was observed for greater <math>\text{PO}_4^{3-}</math> concentrations (0.2 mM).</li> </ul> | NR | <ul style="list-style-type: none"> <li>• 4% decrease in adsorption efficiency was observed with regenerated adsorbents (for 100 <math>\mu\text{g/L}</math> of arsenic at adsorbent dose of 1 g/L with 3hr of contact time)</li> </ul> | <ul style="list-style-type: none"> <li>• Requires extended time of 3 hr to achieve 92% removal for 1 mg/L As(III) concentration.</li> <li>• Less selectivity of adsorbent for arsenic in presence of <math>\text{PO}_4^{3-}</math> (0.2mM).</li> <li>• Adsorption capacity of the adsorbent is very less.</li> </ul> | <b>S7</b> |



|                                          |                                                                                                                                                                                                                                                                             |                                                                                                                                                                                                                                                          |                                                                                                                                                                                                                                                                                                                                                                                                                                                                                |                                                                                      |                                                                                                                                                                                                                                                                                                                           |                                                                     |                                                                                                                                                                   |                                                                                                                                                                                                                                                                                                                                                                                  |                 |
|------------------------------------------|-----------------------------------------------------------------------------------------------------------------------------------------------------------------------------------------------------------------------------------------------------------------------------|----------------------------------------------------------------------------------------------------------------------------------------------------------------------------------------------------------------------------------------------------------|--------------------------------------------------------------------------------------------------------------------------------------------------------------------------------------------------------------------------------------------------------------------------------------------------------------------------------------------------------------------------------------------------------------------------------------------------------------------------------|--------------------------------------------------------------------------------------|---------------------------------------------------------------------------------------------------------------------------------------------------------------------------------------------------------------------------------------------------------------------------------------------------------------------------|---------------------------------------------------------------------|-------------------------------------------------------------------------------------------------------------------------------------------------------------------|----------------------------------------------------------------------------------------------------------------------------------------------------------------------------------------------------------------------------------------------------------------------------------------------------------------------------------------------------------------------------------|-----------------|
| <b>FeMn-synergetic adsorbent</b>         | <ul style="list-style-type: none"> <li>• <b>Dose:</b> 2 g/L</li> <li>• <b>pH:</b> 3.5 ± 0.1</li> <li>• <b>Time:</b> 24 hr.</li> <li>• <b>C<sub>0</sub>:</b> 0.45 mg/L</li> <li>• <b>Vol. of Sample:</b> NR</li> <li>• <b>Temperature:</b> 298 K</li> </ul>                  | Adsorption studies conducted at 3.5.                                                                                                                                                                                                                     | <ul style="list-style-type: none"> <li>• 95% removal of As(III) was achieved in 1hr for initial concentration of 0.45 mg/L.</li> <li>• Pseudo-second order kinetics</li> </ul>                                                                                                                                                                                                                                                                                                 | As(III): $q_m = 10.55$ mg/g<br>Langmuir isotherm model<br>As(V): NR                  | <ul style="list-style-type: none"> <li>• Cl<sup>-</sup>, NO<sub>3</sub><sup>-</sup> and SO<sub>4</sub><sup>2-</sup> had negligible influence on As(III) removal, while the effect of PO<sub>4</sub><sup>3-</sup> and SiO<sub>3</sub><sup>2-</sup> was more pronounced.</li> </ul>                                         | NR                                                                  | <ul style="list-style-type: none"> <li>• The removal percentages were maintained at nearly 100% during the five cycles with regeneration of adsorbent.</li> </ul> | <ul style="list-style-type: none"> <li>• Batch experiments conducted at pH 3.5 which does not fall under the pH range of drinking water.</li> <li>• Requirement of higher adsorbent dose for low arsenic concentration to reach equilibrium.</li> <li>• The efficiency of adsorbent was not examined for real groundwater.</li> </ul>                                            | <b>S8</b>       |
| <b>Nanoscale Zero valent iron (NZVI)</b> | <ul style="list-style-type: none"> <li>• <b>Dose:</b> 1 g/L</li> <li>• <b>pH:</b> 7</li> <li>• <b>Time:</b> 12 hr</li> <li>• <b>C<sub>0</sub>:</b> 1 mg/L of As(III) in 0.01 M NaCl</li> <li>• <b>Vol. of Sample:</b> 20 ml</li> <li>• <b>Temperature:</b> 25° C</li> </ul> | <ul style="list-style-type: none"> <li>• 88.6-99.9% removal of As(III) was achieved in pH range 4-10.</li> </ul>                                                                                                                                         | <ul style="list-style-type: none"> <li>• 80% of As(III) was removed in 7 minutes for initial concentration of 1 mg/L arsenic.</li> <li>• Pseudo-second order kinetics.</li> </ul>                                                                                                                                                                                                                                                                                              | As(III): $q_m = 3.5$ mg/g<br>Freundlich isotherm model<br>As(V): NR                  | <ul style="list-style-type: none"> <li>• No effect of HCO<sub>3</sub><sup>-</sup>, SO<sub>4</sub><sup>2-</sup> and NO<sub>3</sub><sup>-</sup>.</li> <li>• However the presence of 10mM of SiO<sub>4</sub><sup>4-</sup> and PO<sub>4</sub><sup>3-</sup> reduced As(III) uptake from 99.9 % to 44.94 % and 66.3%</li> </ul> | 100% removal efficiency was achieved with 1.0-4.5 g/L of NZVI.      | NR                                                                                                                                                                | <ul style="list-style-type: none"> <li>• Requirement of greater amount of adsorbent dose for complete removal of As(III) in ground water environment.</li> </ul>                                                                                                                                                                                                                 | <b>S9</b>       |
| <b>Zero-valent Manganese (ZVM)</b>       | <ul style="list-style-type: none"> <li>• <b>Dose:</b> 0.2 g/L</li> <li>• <b>pH:</b> 6.5 ± 0.2</li> <li>• <b>Time:</b> 1 hr.</li> <li>• <b>C<sub>0</sub>:</b> 0.1-50 mg/L</li> <li>• <b>Vol. of Sample:</b> 50 ml</li> <li>• <b>Temperature:</b> 25° C</li> </ul>            | <ul style="list-style-type: none"> <li>• More than 90% removal was achieved in a wide pH range (3.0-9.0) for both As(III) and As(V).</li> <li>• In neutral pH range, material is capable to reduce the arsenic concentration below WHO limit.</li> </ul> | <ul style="list-style-type: none"> <li>• Removal of 95.7% and 99.9% was achieved for 0.2 mg/L and 1 mg/L of As(V) in 30 minutes and 1 hr.</li> <li>• 99.31% and 89.2% of As(III) was removed for 0.2 mg/L and 1 mg/L of As(III) in 30 minutes and 1 hr. respectively.</li> <li>• The presence of Fe(II) enhanced arsenic removal efficiency to 95.24% and 99% in 1 hr compared to the removal achieved in As(mix) solution.</li> <li>• Pseudo-second order kinetics</li> </ul> | As(III): $q_m = 30.9$ mg/g<br>DR isotherm<br>As(V): $q_m = 72.5$ mg/g<br>DR isotherm | <ul style="list-style-type: none"> <li>• No major influence of Cl<sup>-</sup>, NO<sub>3</sub><sup>-</sup>, SO<sub>4</sub><sup>2-</sup>.</li> <li>• Higher selectivity of ZVM for arsenic over phosphate even at high concentrations. (As:PO<sub>4</sub><sup>3-</sup> = 1:1,1:5,5:1)</li> </ul>                            | Arsenic was removed below WHO-MCL limit in all groundwater samples. | Even after 5 <sup>th</sup> cycle, adsorbent exhibits removal efficiency of 91.8% for As(III) and 94.2% for As(V).                                                 | <ul style="list-style-type: none"> <li>• Provides single step treatment option for total arsenic without any pretreatment.</li> <li>• Material exhibits faster kinetics for both As(III) and As(V).</li> <li>• Material shows high reuse capacity.</li> <li>• Material was efficient enough to remediate total arsenic below the WHO-MCL in ground water environment.</li> </ul> | <b>Our Work</b> |

\*NR: Not Reported

## References:

- S1 J. Zhu, S. A. Baig, T. Sheng, Z. Lou, Z. Wang and X. Xu, *J. Hazard. Mater.*, 2015, **286**, 220–228.
- S2 V. K. Rathore and P. Mondal, *Ind. Eng. Chem. Res.*, 2017, **56**, 8081-8094.
- S3 P. Pillewan, S. Mukherjee, T. Roychowdhury, S. Das, A. Bansiwala and S. Rayalu, *J. Hazard. Mater.*, 2011, **186**, 367–375.
- S4 Z. Wang, X. Shen, M. Jing and C. Li, *J. Alloys Compd.*, 2018, **735**, 1620–1628.
- S5 T. Wang, L. Zhang, H. Wang, W. Yang, Y. Fu, W. Zhou, W. Yu, K. Xiang, Z. Su, S. Dai and L. Chai, *ACS Appl. Mater. Interfaces*, 2013, **5**, 23, 12449-12459.
- S6 S. A. Ntim and S. Mitra, *J. Chem. Eng. Data*, 2011, **56**, 2077–2083.
- S7 A. Goswami, P. K. Raul and M. K. Purkait, *Chem. Eng. Res. Des.*, 2012, **90**, 1387-1396.
- S8 B. Zhi, H. Ding, D. Wang, Y. Cao, Y. Zhang, X. Wang, Y. Liu and Q. Huo, *J. Mater. Chem. A*, 2014, **2**, 2374–2382.
- S9 S. R. Kanel, and B. Manning, L. Charlet and H. Choi, *Environ. Sci. Technol.*, 2005, **39**, 1291–1298.
